# Supplementary material for: Fabricating carbon-based electrode materials via uptake of amino nano-polystyrene into Pistia stratiotes roots for enhancing supercapacitance
Source: Royal Society of Chemistry journal article supplement (doi:10.1039/d3gc02573j), 2023-01-01
Supplement: d3gc02573j1.pdf [file d3gc02573j1.pdf]

Supporting Information for

**Fabricating Carbon-Based Electrode Materials via Uptake of Amino Nano-Polystyrene into Pistia Stratiotes Root for Enhancing Supercapacitance**

Liru Su, Jinling Li, Fen Ran\*

*State Key Laboratory of Advanced Processing and Recycling of Non-ferrous Metals,  
Department of Polymeric Materials Engineering, School of Material Science and Engineering,  
Lanzhou University of Technology, Lanzhou 730050, Gansu, P. R. China*

*\*Corresponding author: ranfen@lut.edu.cn, or ranfen@163.com*

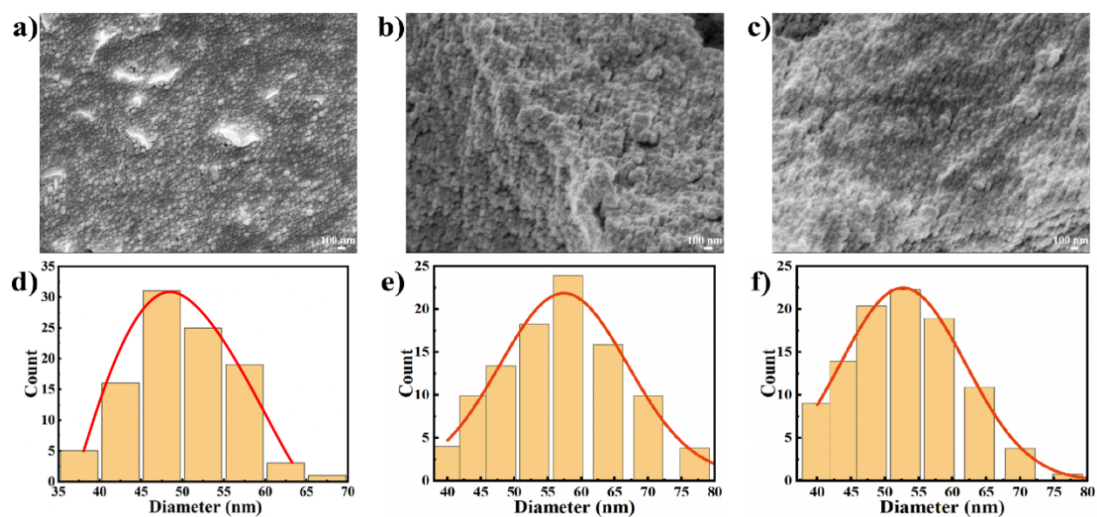

**Figure S1** SEM images and particle size distribution of PS, PS-NH<sub>2</sub> and PS-COOH.

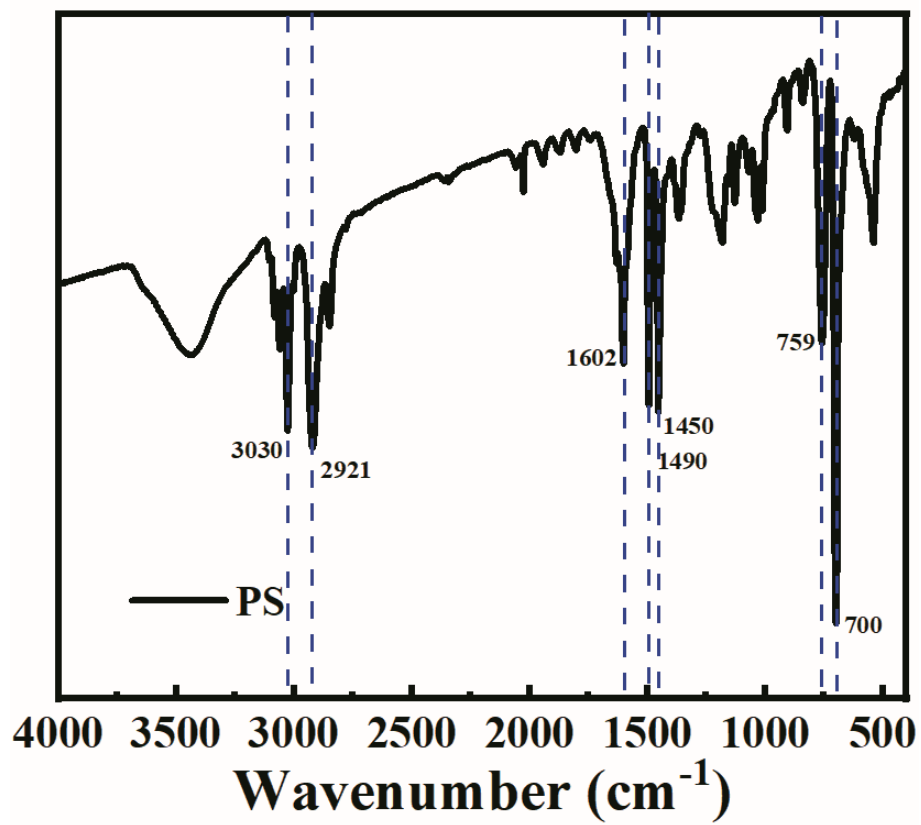

*Figure S2 FT-IR spectrum of PS NPs.*

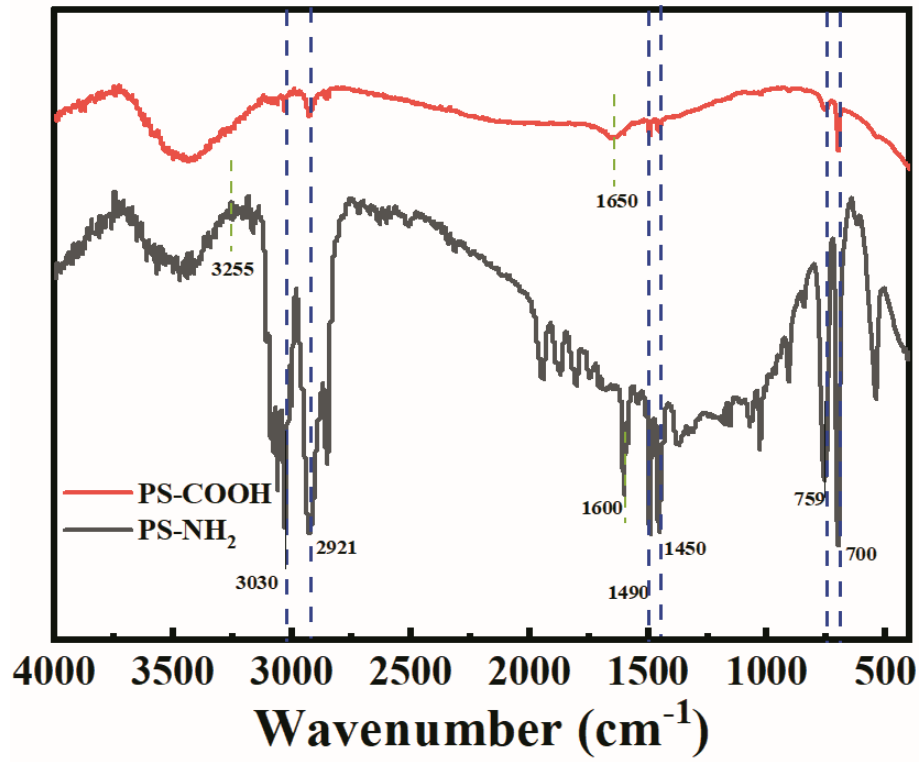

*Figure S3 FT-IR spectrum of PS-NH<sub>2</sub> and PS-COOH NPs*

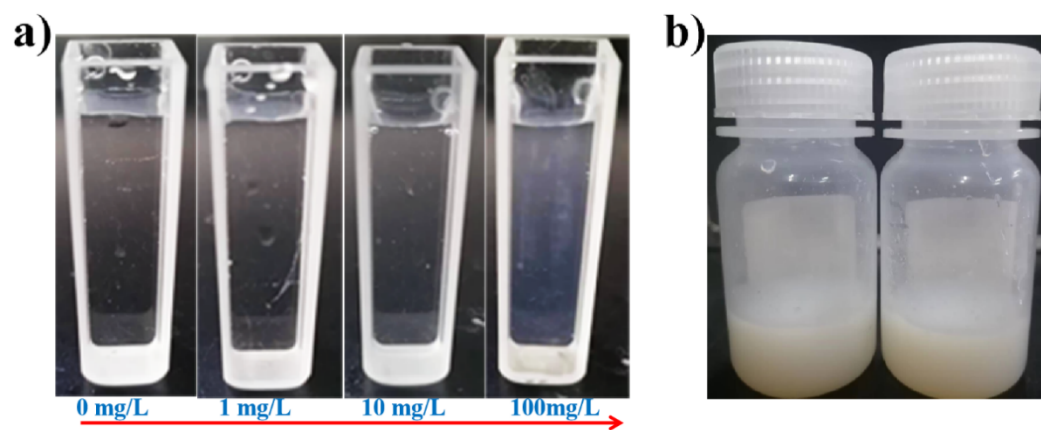

**Figure S4** a) PS NPs of different concentration, b) the purchased PS emulsion (left: PS-NH<sub>2</sub>, right: PS-COOH).

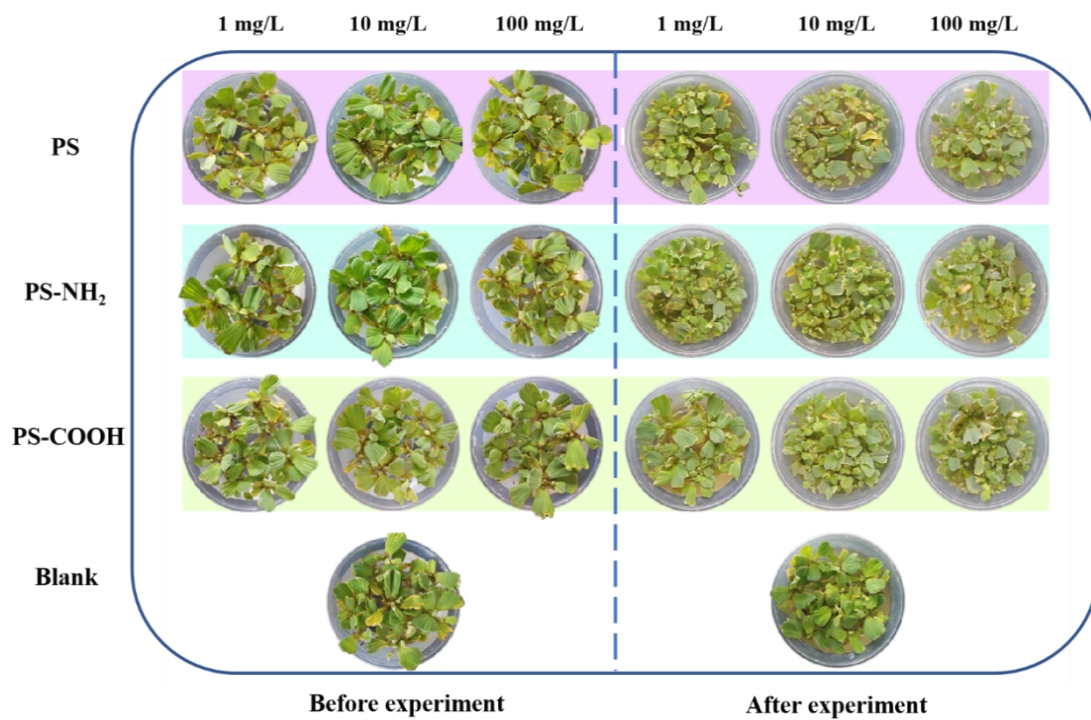

*Figure S5. Digital photos of Pistia stratiotes before and after experiment.*

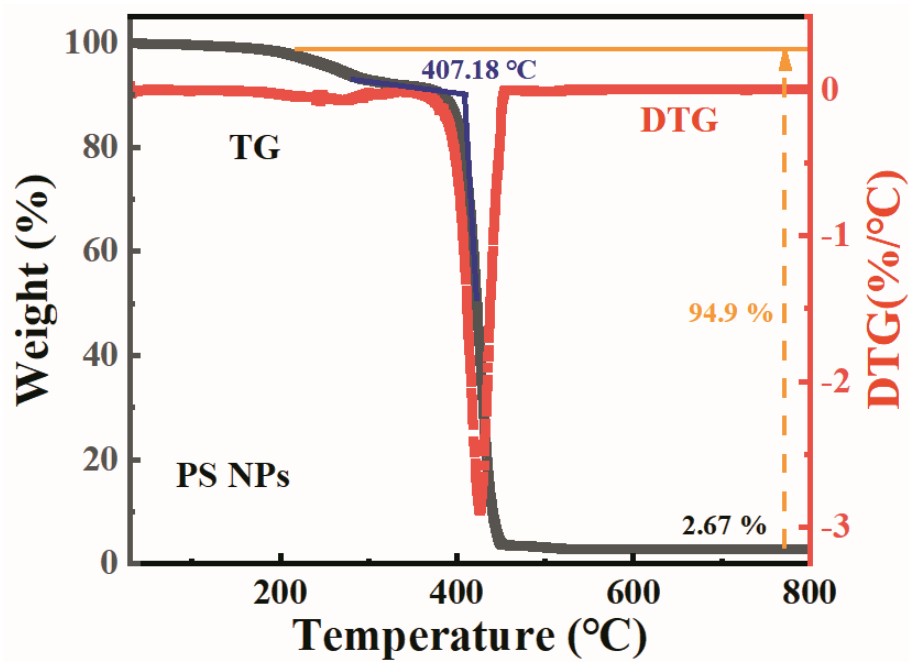

*Figure S6* TG/DTG curve of PS-NH<sub>2</sub> NPs.

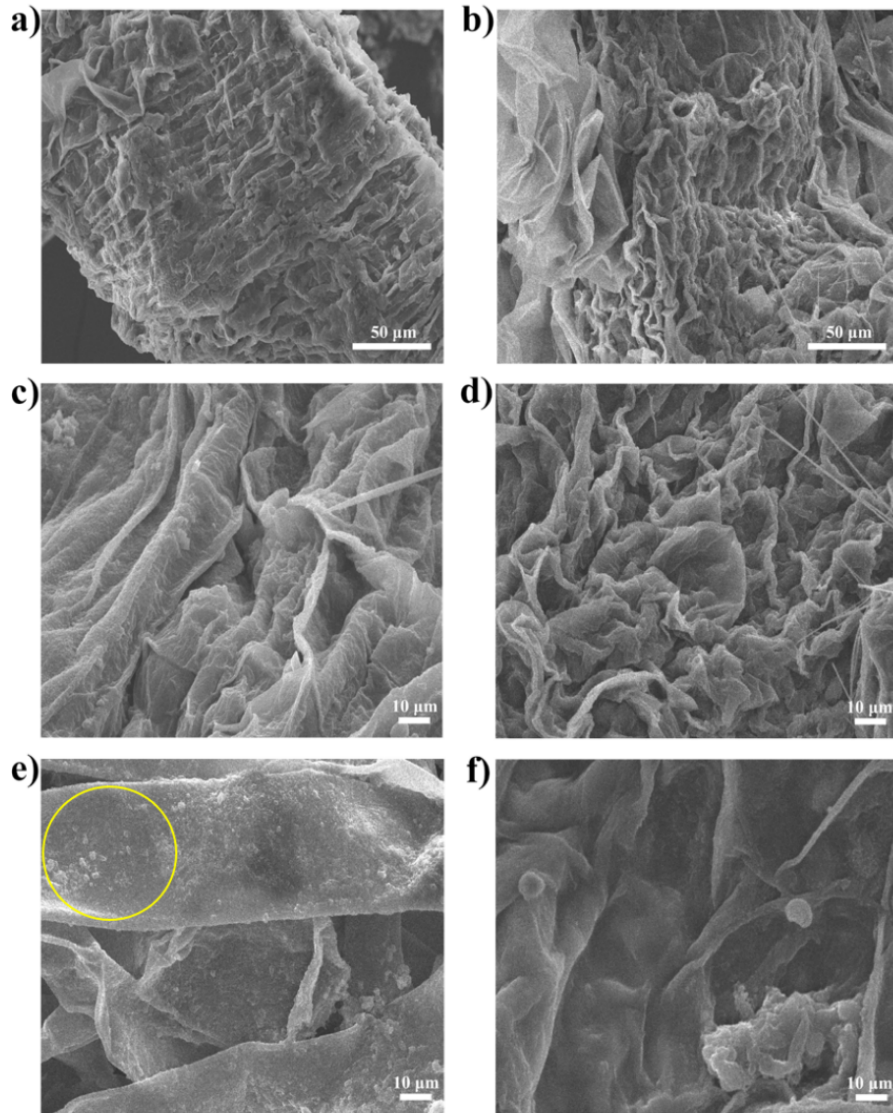

**Figure S7** SEM photos of different parts of *Pistia stratiotes*: a), c) roots of control group, b), d) shoots of control group, e), f) are the photos of roots/shoots of experimental group, respectively.



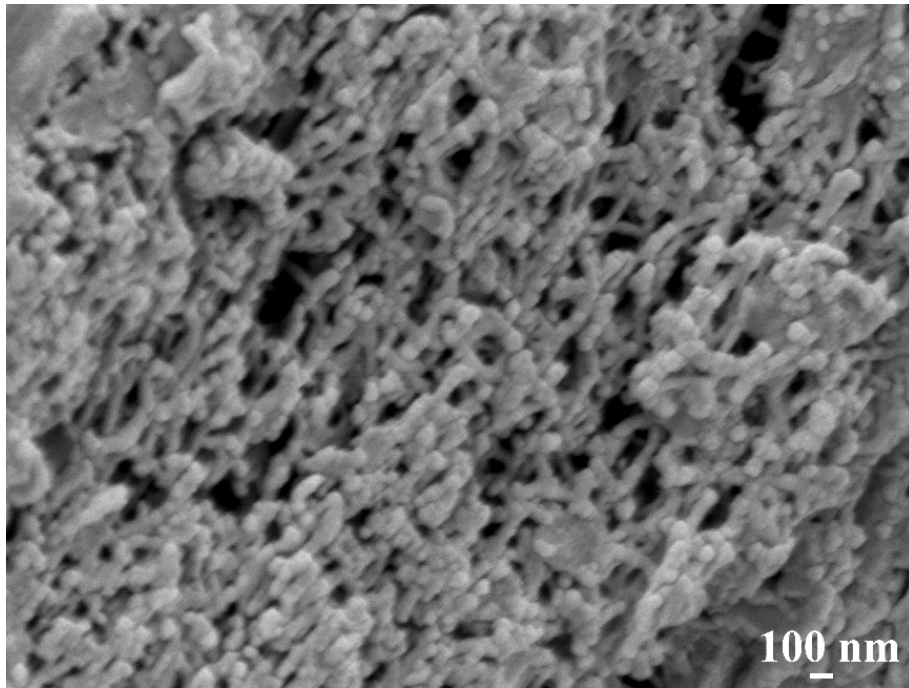

*Figure S8 SEM image of  $PC_{II_{100}}$ . Scale bar: 100 nm.*

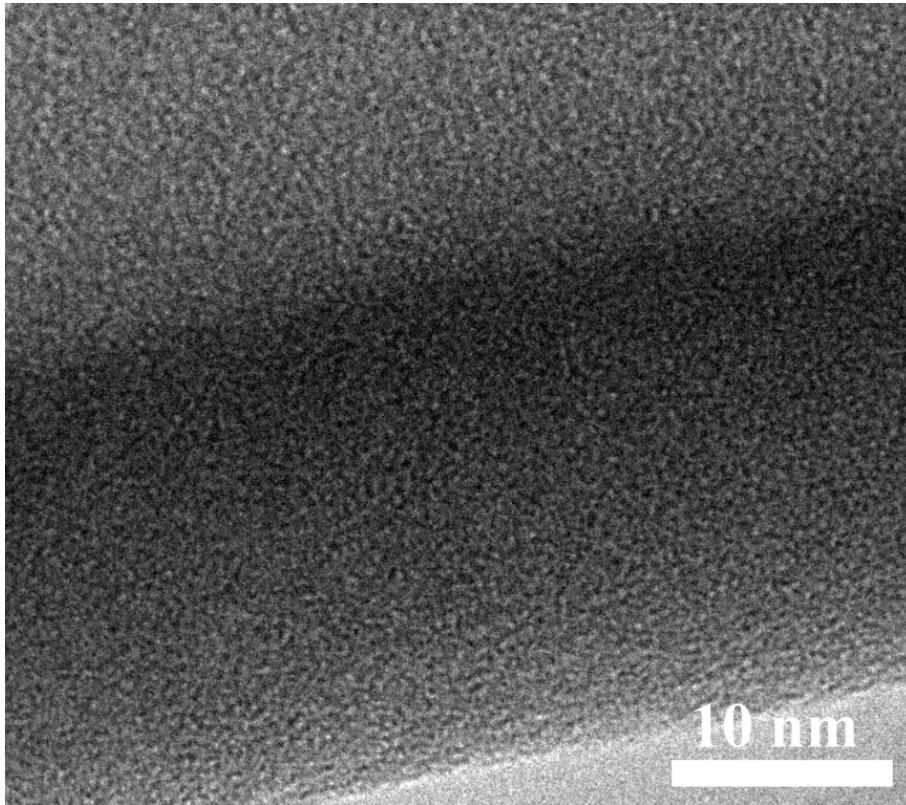

*Figure S9* TEM image of  $PC_{1100}$

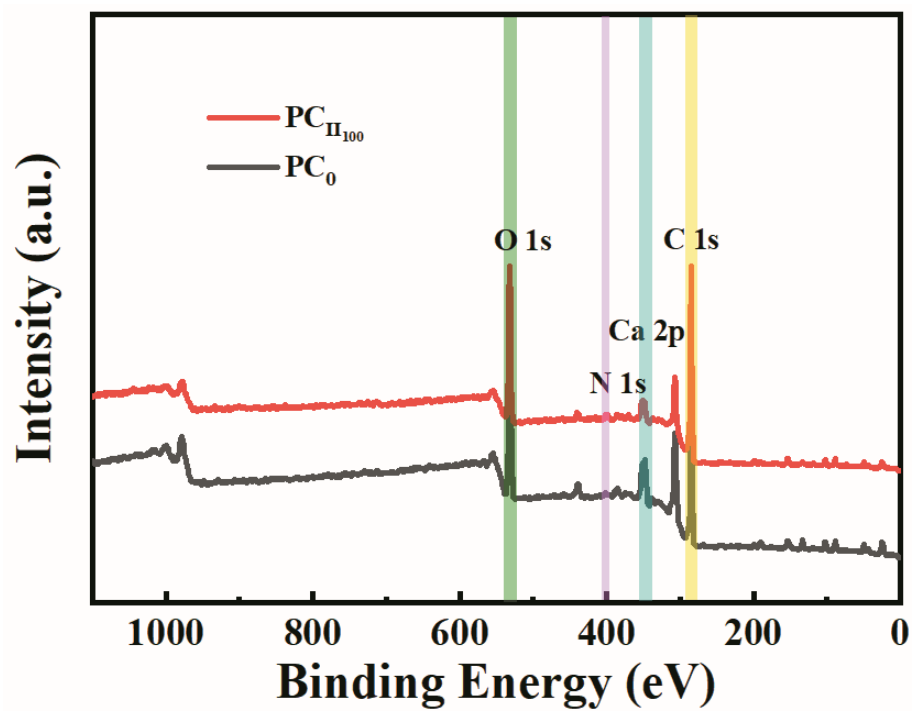

*Figure S10 XPS spectra of  $PC_{II_{100}}$  and  $PC_0$ .*

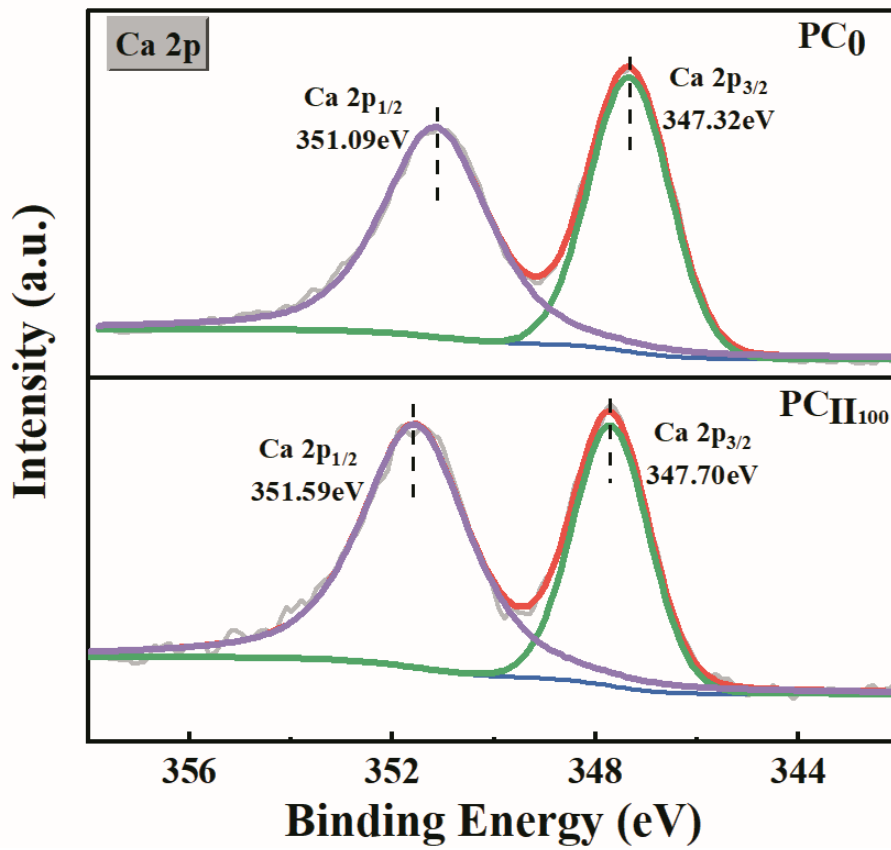

Figure S11 High-resolution XPS spectra of Ca 2p.

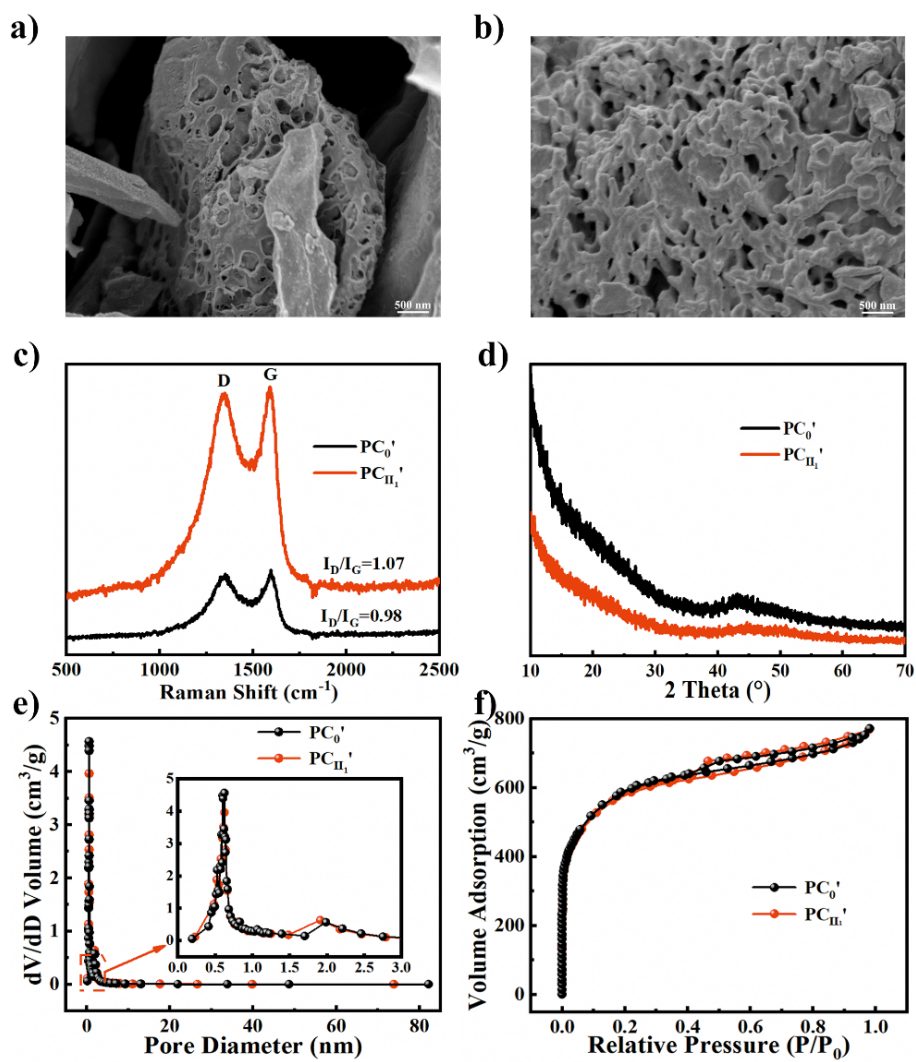

**Figure S12** SEM image of  $PC_0'$  a) and  $PC_{II_1}'$  b); c) Raman spectra; d) XRD patterns; e) pore size distribution curves; f) nitrogen adsorption-desorption isotherms.

**Table S1.** Pore structure parameters and specific surface area information of shoot samples

| <b>Samples</b>     | <b>S<sub>BET</sub></b><br><b>(m<sup>2</sup>/g)</b> | <b>S<sub>mic</sub></b><br><b>(m<sup>2</sup>/g)</b> | <b>V<sub>total</sub></b><br><b>(cm<sup>3</sup>/g)</b> | <b>V<sub>mic</sub></b><br><b>(cm<sup>3</sup>/g)</b> | <b>d</b><br><b>(nm)</b> | <b>Micropore</b><br><b>(%)</b> | <b>Mesopore&amp;</b><br><b>Macropore</b><br><b>(%)</b> |
|--------------------|----------------------------------------------------|----------------------------------------------------|-------------------------------------------------------|-----------------------------------------------------|-------------------------|--------------------------------|--------------------------------------------------------|
| PC <sub>0</sub> '  | 2078.182                                           | 1645.638                                           | 1.192                                                 | 0.737                                               | 2.294                   | 61.83                          | 38.17                                                  |
| PC <sub>II</sub> ' | 2020.279                                           | 1612.080                                           | 1.188                                                 | 0.731                                               | 2.352                   | 61.53                          | 38.47                                                  |

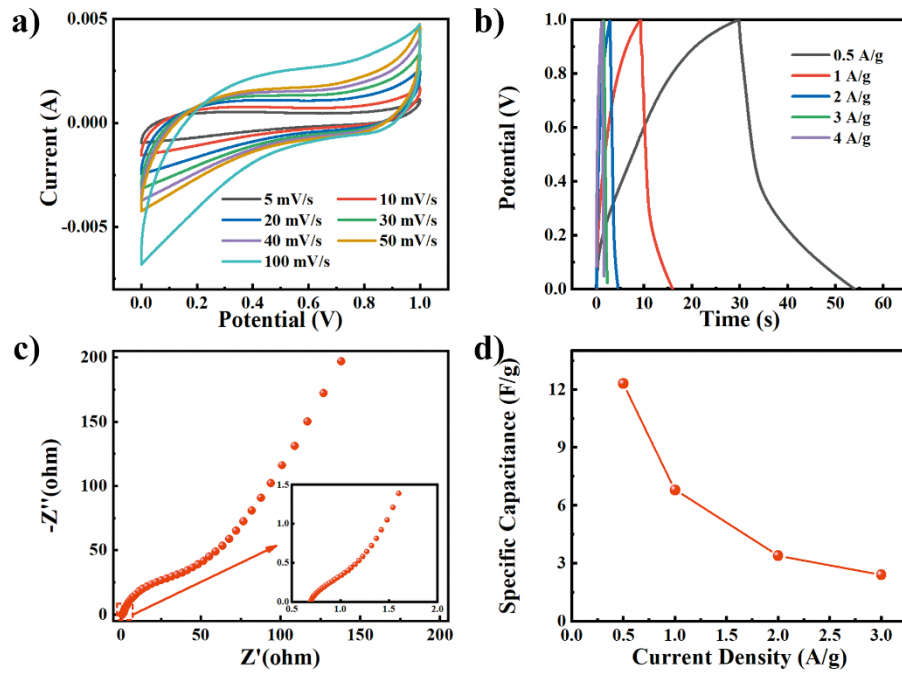

**Figure S13** Electrochemical properties of symmetric devices based on PC<sub>1100</sub>: a) CV; b) GCD; c) EIS, d) rate performance.

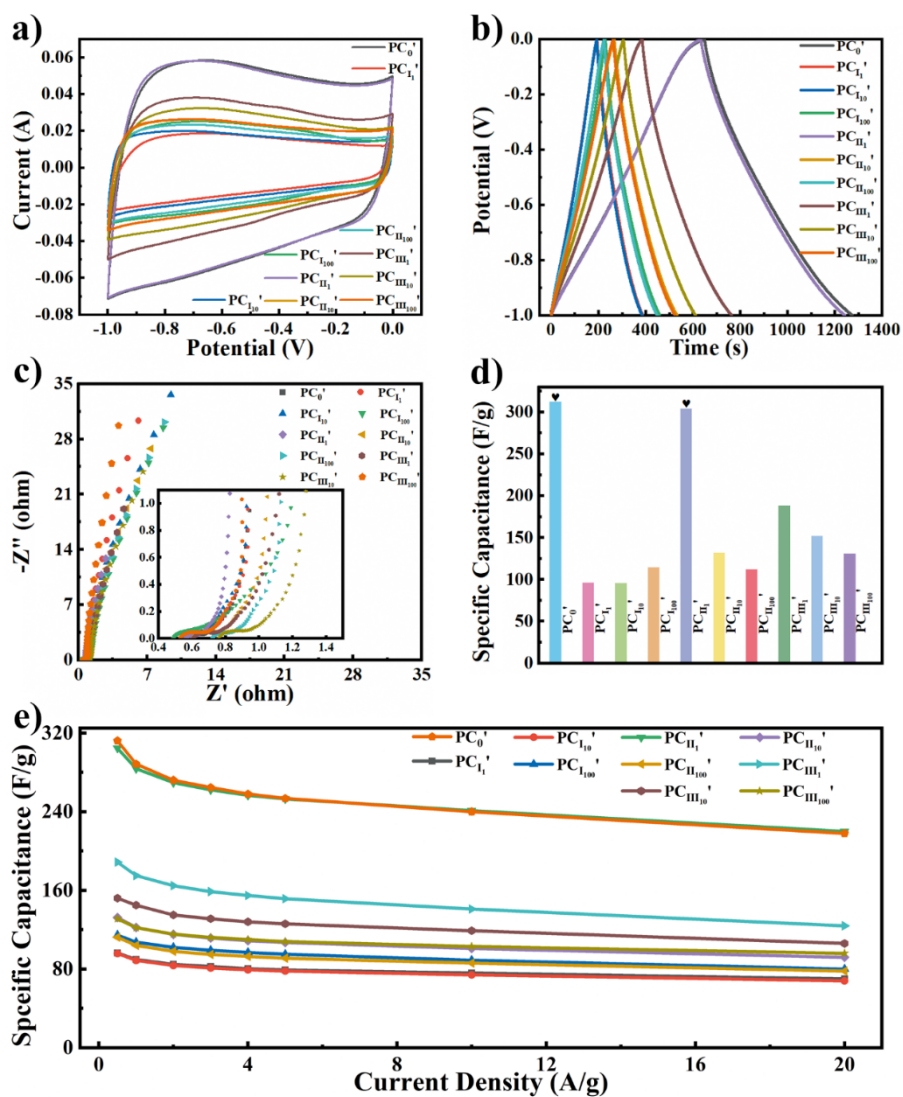

**Figure S14** Electrochemical properties of shoots: a) CV curves at 50 mV/s; b) GCD curves at 0.5 A/g; c) EIS spectra (inset: EIS spectra of high-frequency region); d) mass specific capacitance at 0.5 A/g and e) rate performance.
